# Supplementary material for: AC-electric-field-controlled multi-component droplet coalescence at microscale
Source: Royal Society of Chemistry journal article supplement (doi:10.1039/d3lc00086a), 2023-01-01
Supplement: d3lc00086a7.pdf [file d3lc00086a7.pdf]

## Supplementary information

# AC Electric Field Controlled Multi-component Droplet Coalescence at Microscale

Weidong Fang<sup>1</sup>, Zhi Tao<sup>1</sup>, Haiwang Li<sup>1</sup>, Shuai Yin<sup>2</sup>, Tiantong Xu<sup>1</sup>, Yi Huang<sup>1,\*</sup>, Teckneng Wong<sup>3</sup>

1. National Key Laboratory of Science and Technology on Aero-Engine Aero-Thermodynamics, Research Institute of Aero-Engine, Beihang University, Beijing, 100191, China.
2. School of Mechanical and Power Engineering, Nanjing Tech University, Nanjing 211816, China
3. School of Mechanical and Aerospace Engineering, Nanyang Technological University. 50 Nanyang Avenue, 639798 Singapore

Corresponding Author Email: [huangyi\\_buaa@buaa.edu.cn](mailto:huangyi_buaa@buaa.edu.cn)

**Table.S1 Surface tension coefficient and conductivity of fluids**

| <b>Fluids</b>          | <b>Compositions</b>                                        | <b>Surface tension coefficient<sup>1</sup></b> | <b>Conductivity (<math>\mu\text{S cm}</math>)<sup>2</sup></b> |
|------------------------|------------------------------------------------------------|------------------------------------------------|---------------------------------------------------------------|
| <b>Organic phase</b>   | <b>5 wt% Span 80 in mineral oil</b>                        | <b>30.722</b>                                  | <b>0</b>                                                      |
| <b>Aqueous phase 1</b> | <b>Deionized water</b>                                     | <b>71.757</b>                                  | <b>2.98</b>                                                   |
| <b>Aqueous phase 2</b> | <b>70 wt% glycerol in deionized water</b>                  | <b>67.263</b>                                  | <b>1.26</b>                                                   |
| <b>Aqueous phase 3</b> | <b>70 wt% glycerol and 0.03 wt% PEO in deionized water</b> | <b>57.170</b>                                  | <b>3.05</b>                                                   |
| <b>Aqueous phase 4</b> | <b>0.05 wt% SDS in deionized water</b>                     | <b>38.727</b>                                  | <b>432.0</b>                                                  |
| <b>Aqueous phase 5</b> | <b>0.20 wt% Tween 20 in deionized water</b>                | <b>39.219</b>                                  | <b>20.00</b>                                                  |
| <b>Aqueous phase 6</b> | <b>0.1mmol/L NaCl in deionized water</b>                   | <b>71.496</b>                                  | <b>27.5</b>                                                   |
| <b>Aqueous phase 7</b> | <b>1mmol/L NaCl in deionized water</b>                     | <b>71.841</b>                                  | <b>147.9</b>                                                  |
| <b>Aqueous phase 8</b> | <b>100mmol/L NaCl in deionized water</b>                   | <b>72.785</b>                                  | <b>1075</b>                                                   |
| <b>Aqueous phase 9</b> | <b>1000mmol/L NaCl in deionized water</b>                  | <b>74.487</b>                                  | <b>8350</b>                                                   |

<sup>1</sup> The surface tension coefficients are measured by Dataphysics DCAT II using Wilhelmy plate method.

<sup>2</sup> The conductivities are measured by Proline Plus Meters.

**Table.S2 Relative permittivity of fluids**

| <b>Fluids</b>              | <b>Compositions</b>                                            | <b>Relative permittivity <sup>1</sup></b> |
|----------------------------|----------------------------------------------------------------|-------------------------------------------|
| <b>Organic phase</b>       | <b>5 wt% Span 80 in mineral oil</b>                            | <b>2.8</b>                                |
| <b>Aqueous phase<br/>1</b> | <b>Deionized water</b>                                         | <b>80</b>                                 |
| <b>Aqueous phase<br/>2</b> | <b>70 wt% glycerol in deionized water</b>                      | <b>35</b>                                 |
| <b>Aqueous phase<br/>3</b> | <b>70 wt% glycerol and 0.03 wt% PEO in<br/>deionized water</b> | <b>116.92</b>                             |

<sup>1</sup> The dielectric constants are measure by filling the fluids into a capacitor. The capacitances are measured by a precision LCR meter (keysight E4980AL).

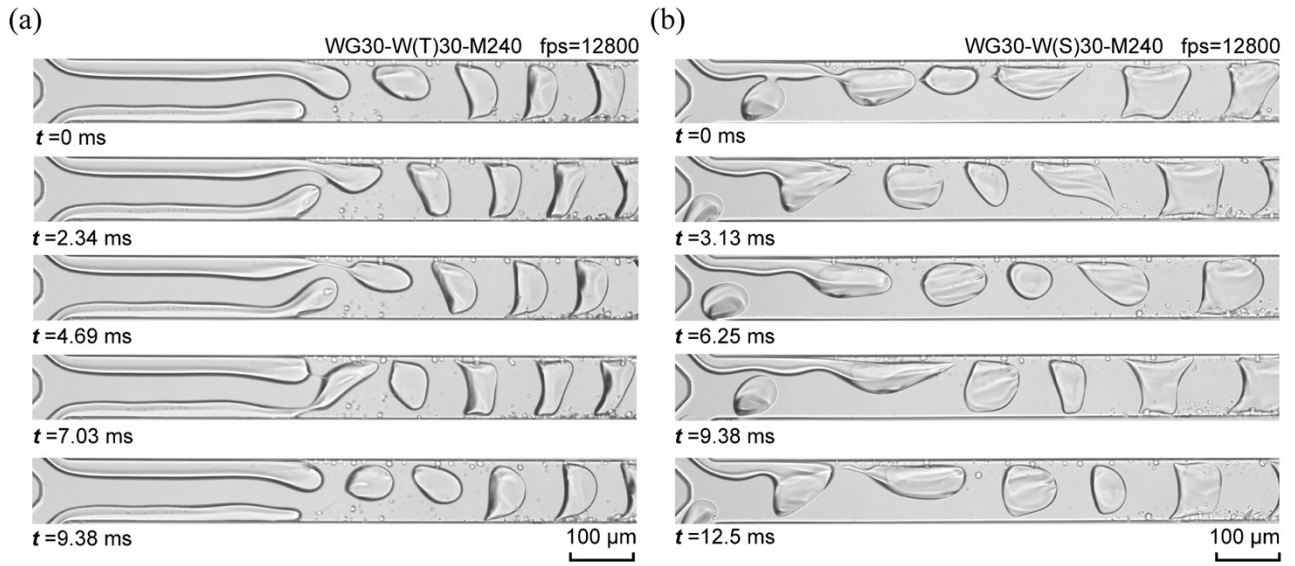

**Fig. S1** Droplet dynamics affected by the surfactant under AC electric fields when  $U$  is 3000 V, and  $f$  is 100 Hz. The flow rate ratio is  $Q_{WG}:Q_W:Q_M = 30:30:240 \mu\text{L h}^{-1}$ . (a) The addition of Tween 20 at a constant ratio of 0.2% by weight. (b) 0.05 wt% SDS is added in the aqueous phase.

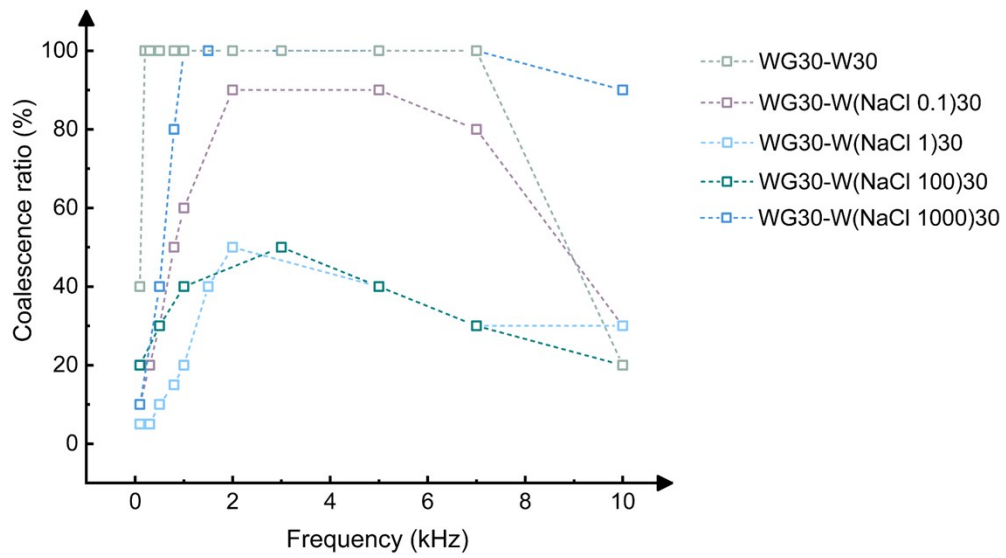

**Fig. S2** Coalescence ratios varies with the applied frequency ranging from 0 ~ 10 kHz and different additions of NaCl in water when  $U$  is 400 V.

## **The caption list of the videos**

Effects of the voltage under AC E-field 100 Hz (AVI)

Effects of the frequency under AC E-field 400 V (AVI)

Effects of the component ratio under AC E-field 500 V 100 Hz (AVI)

Influence of the electric permittivity in aqueous phase under AC E-field 1000 V 100 Hz (AVI)

Impact of surfactant under AC E-field 1500 V, 3000 V 100Hz (AVI)

Electro-mixing of colored droplets (AVI)
